# Supplementary material for: Unraveling the architecture of major histocompatibility complex class II haplotypes in rhesus macaques
Source: HighWire-hosted journal article supplement (doi:10.1101/gr.278968.124), 2024-10-23

Figure 1. Schematic representation of the Mamu-TAP1\*New1 gene structure and its transcripts. The gene structure is shown at the top, with exons numbered 1 to 12. The transcripts are shown below, with their 5' and 3' ends indicated. The transcripts are Mamu-TAP1\*New1, Mamu-TAP1\*New2.01, Mamu-TAP1\*New2.02, Mamu-TAP1\*New3, Mamu-TAP1\*New4, Mamu-TAP1\*New5, Mamu-TAP1\*New6.01/02, Mamu-TAP1\*New6.03, Mamu-TAP1\*New7, Mamu-TAP1\*New8, Mamu-TAP1\*New11, and Mamu-TAP1\*New12. The transcripts are shown in a color-coded manner, with exons represented by colored boxes and introns by lines. The transcripts are shown in a schematic representation, with their 5' and 3' ends indicated. The transcripts are Mamu-TAP1\*New1, Mamu-TAP1\*New2.01, Mamu-TAP1\*New2.02, Mamu-TAP1\*New3, Mamu-TAP1\*New4, Mamu-TAP1\*New5, Mamu-TAP1\*New6.01/02, Mamu-TAP1\*New6.03, Mamu-TAP1\*New7, Mamu-TAP1\*New8, Mamu-TAP1\*New11, and Mamu-TAP1\*New12. The transcripts are shown in a schematic representation, with their 5' and 3' ends indicated.

This figure continues on the next pages.

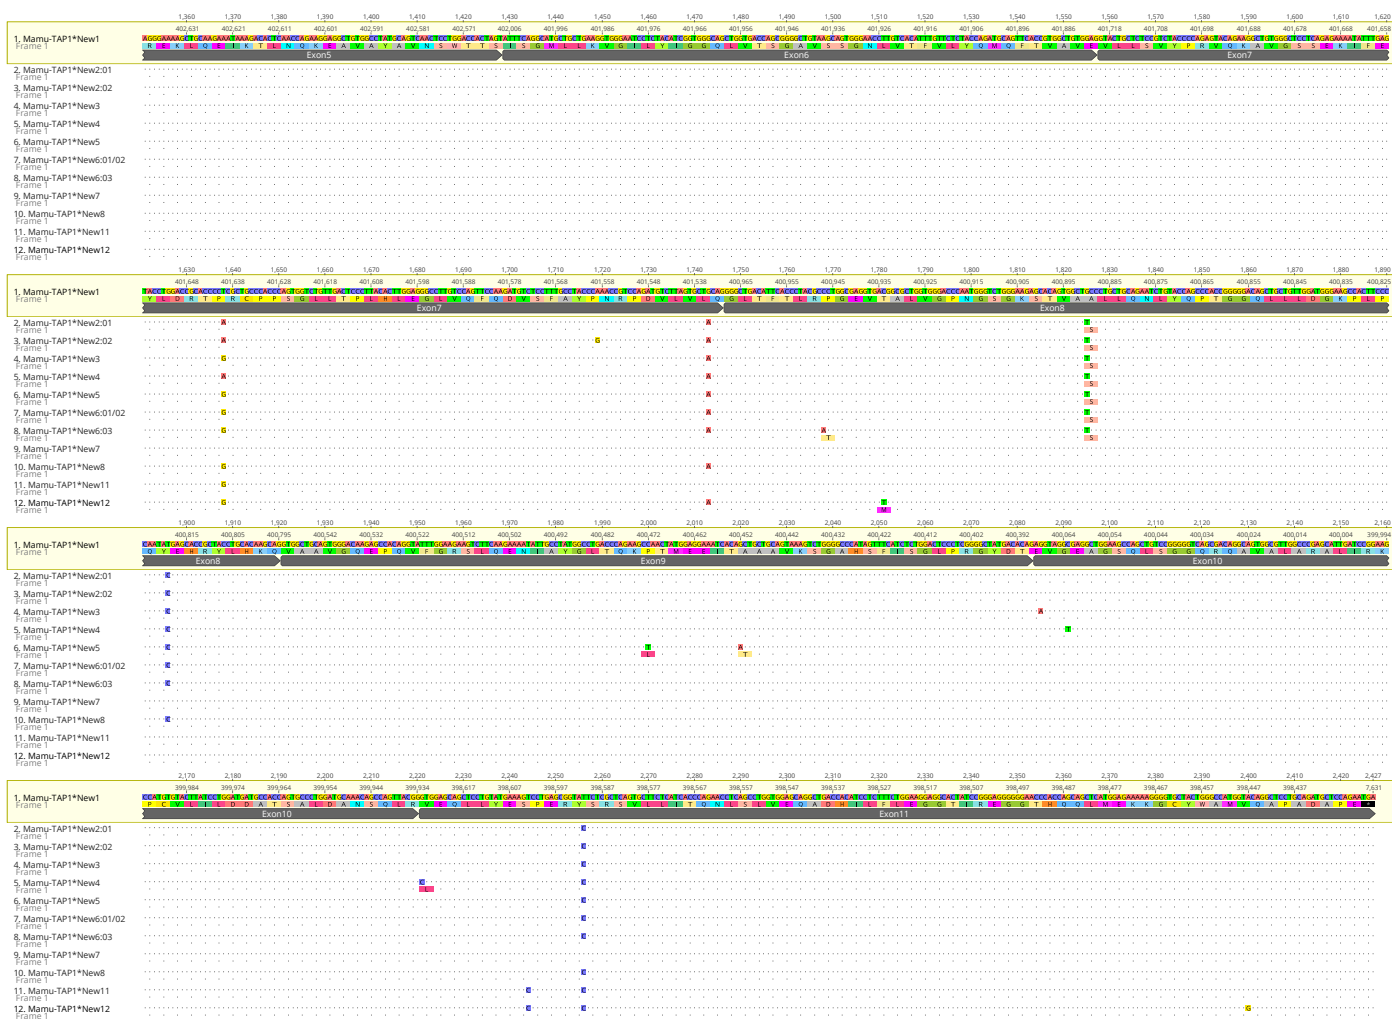

B

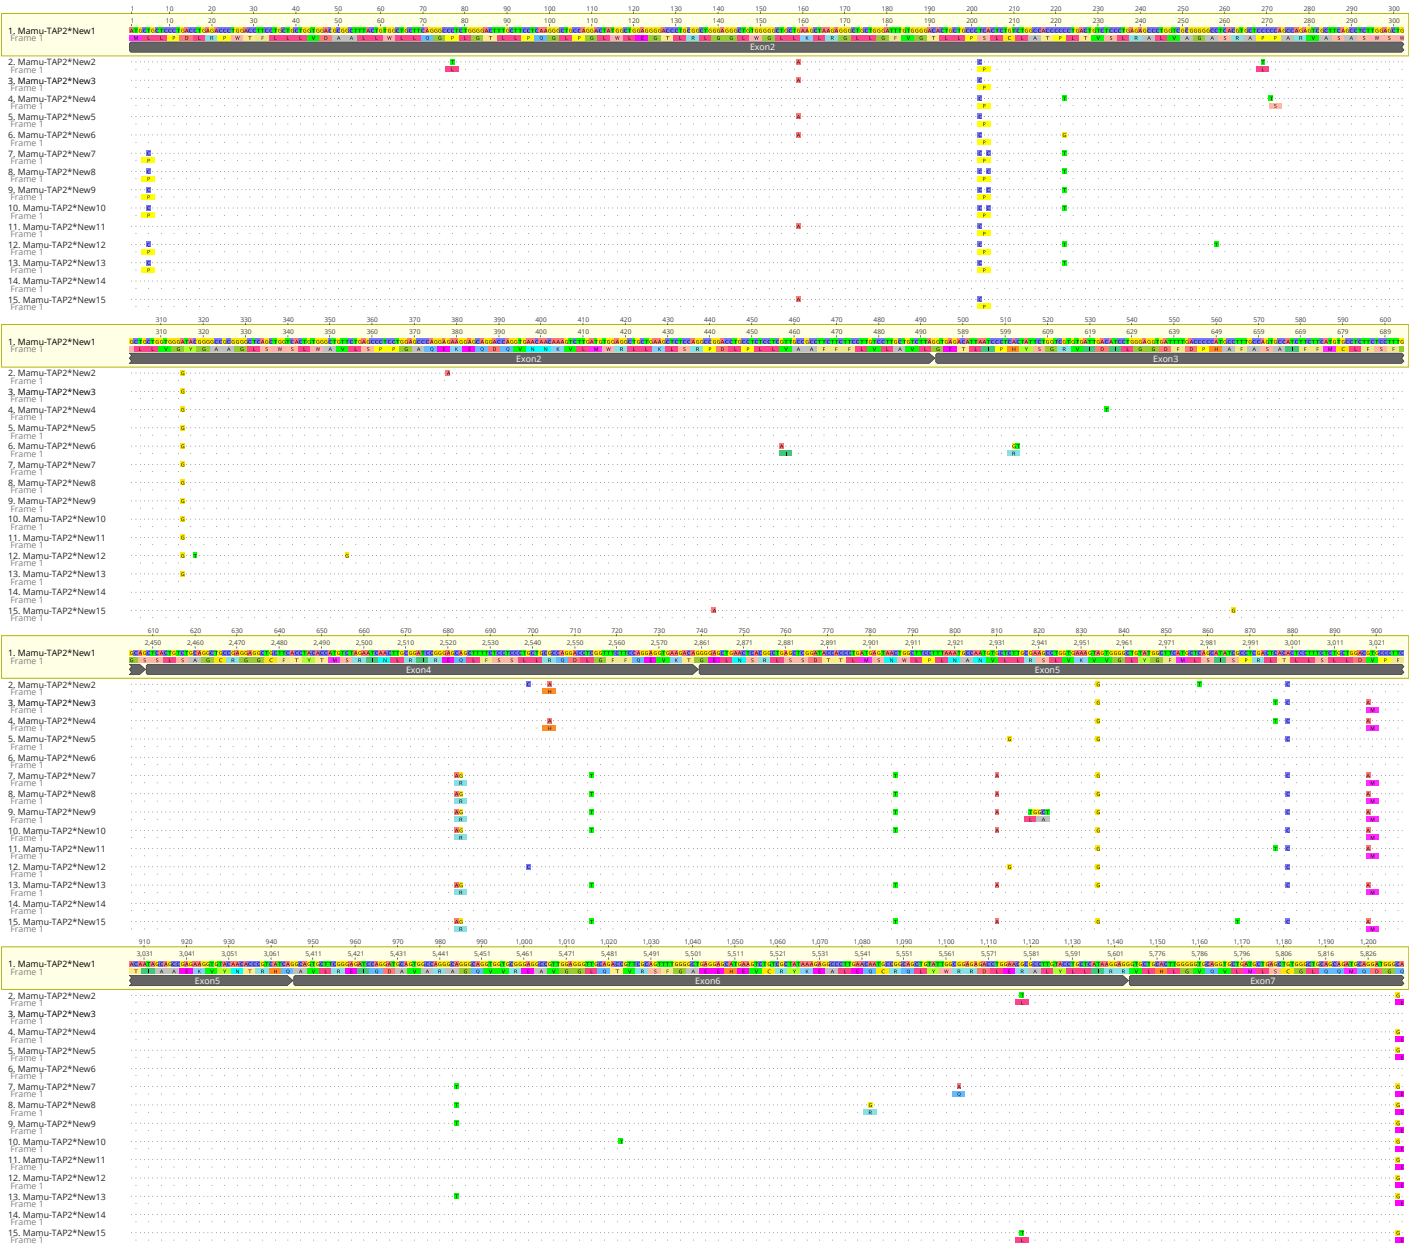

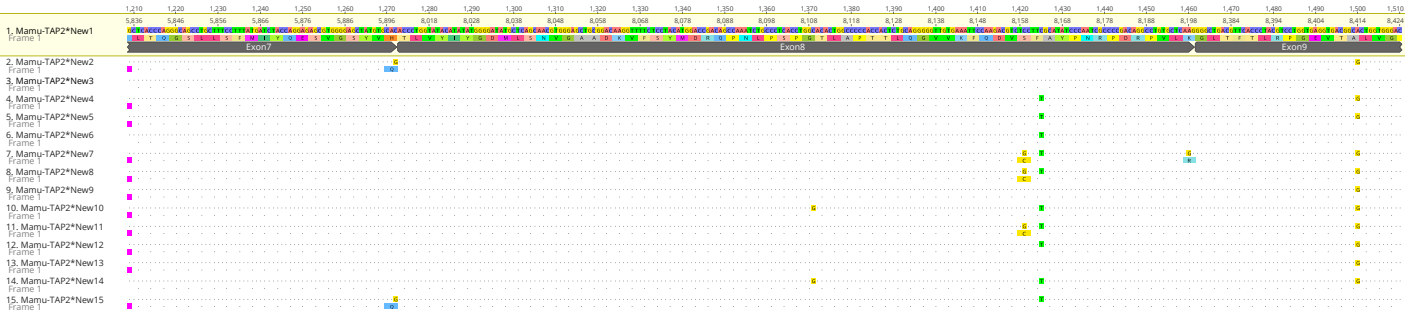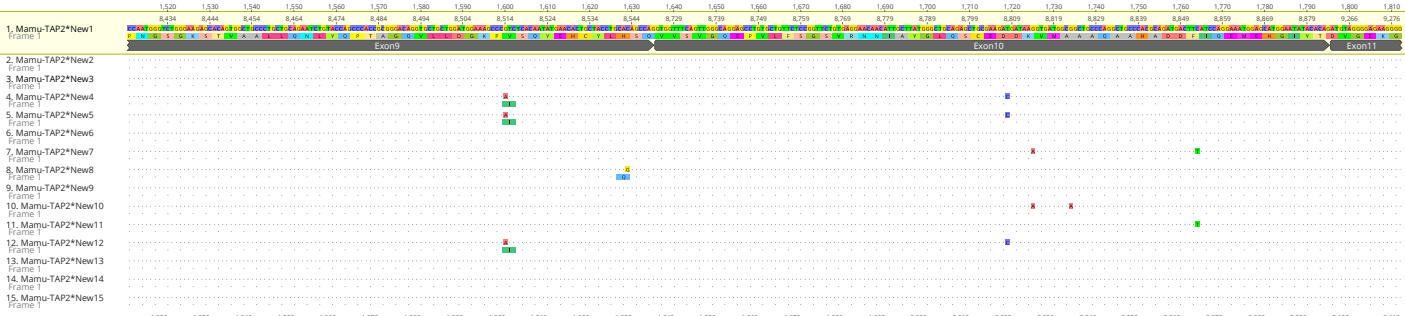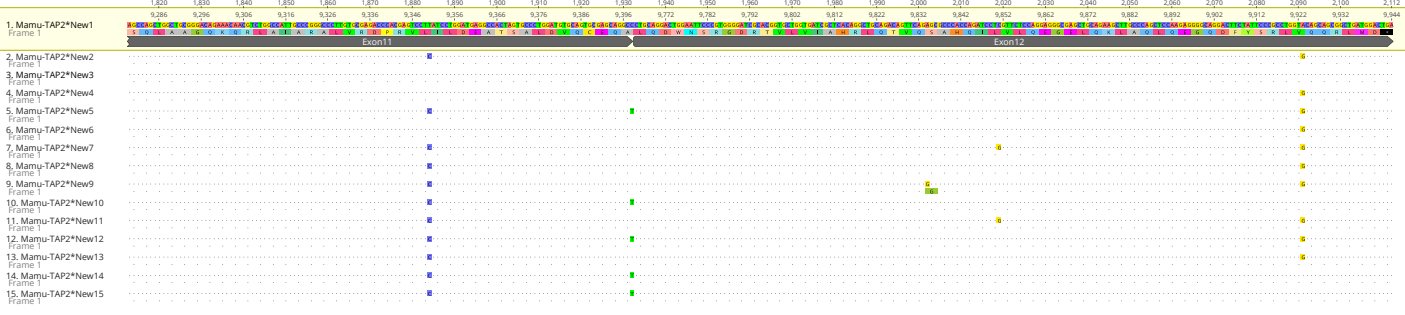

Supplement: Supplemental_Material.zip [file Supplemental_Fig_S3.pdf › Supplemental_Fig_S3.pdf]
