# Supplementary material for: Unraveling the architecture of major histocompatibility complex class II haplotypes in rhesus macaques
Source: HighWire-hosted journal article supplement (doi:10.1101/gr.278968.124), 2024-10-23
Supplement: Supplemental_Material.zip [file Supplemental_Fig_S4.pdf › Supplemental_Fig_S4.pdf]

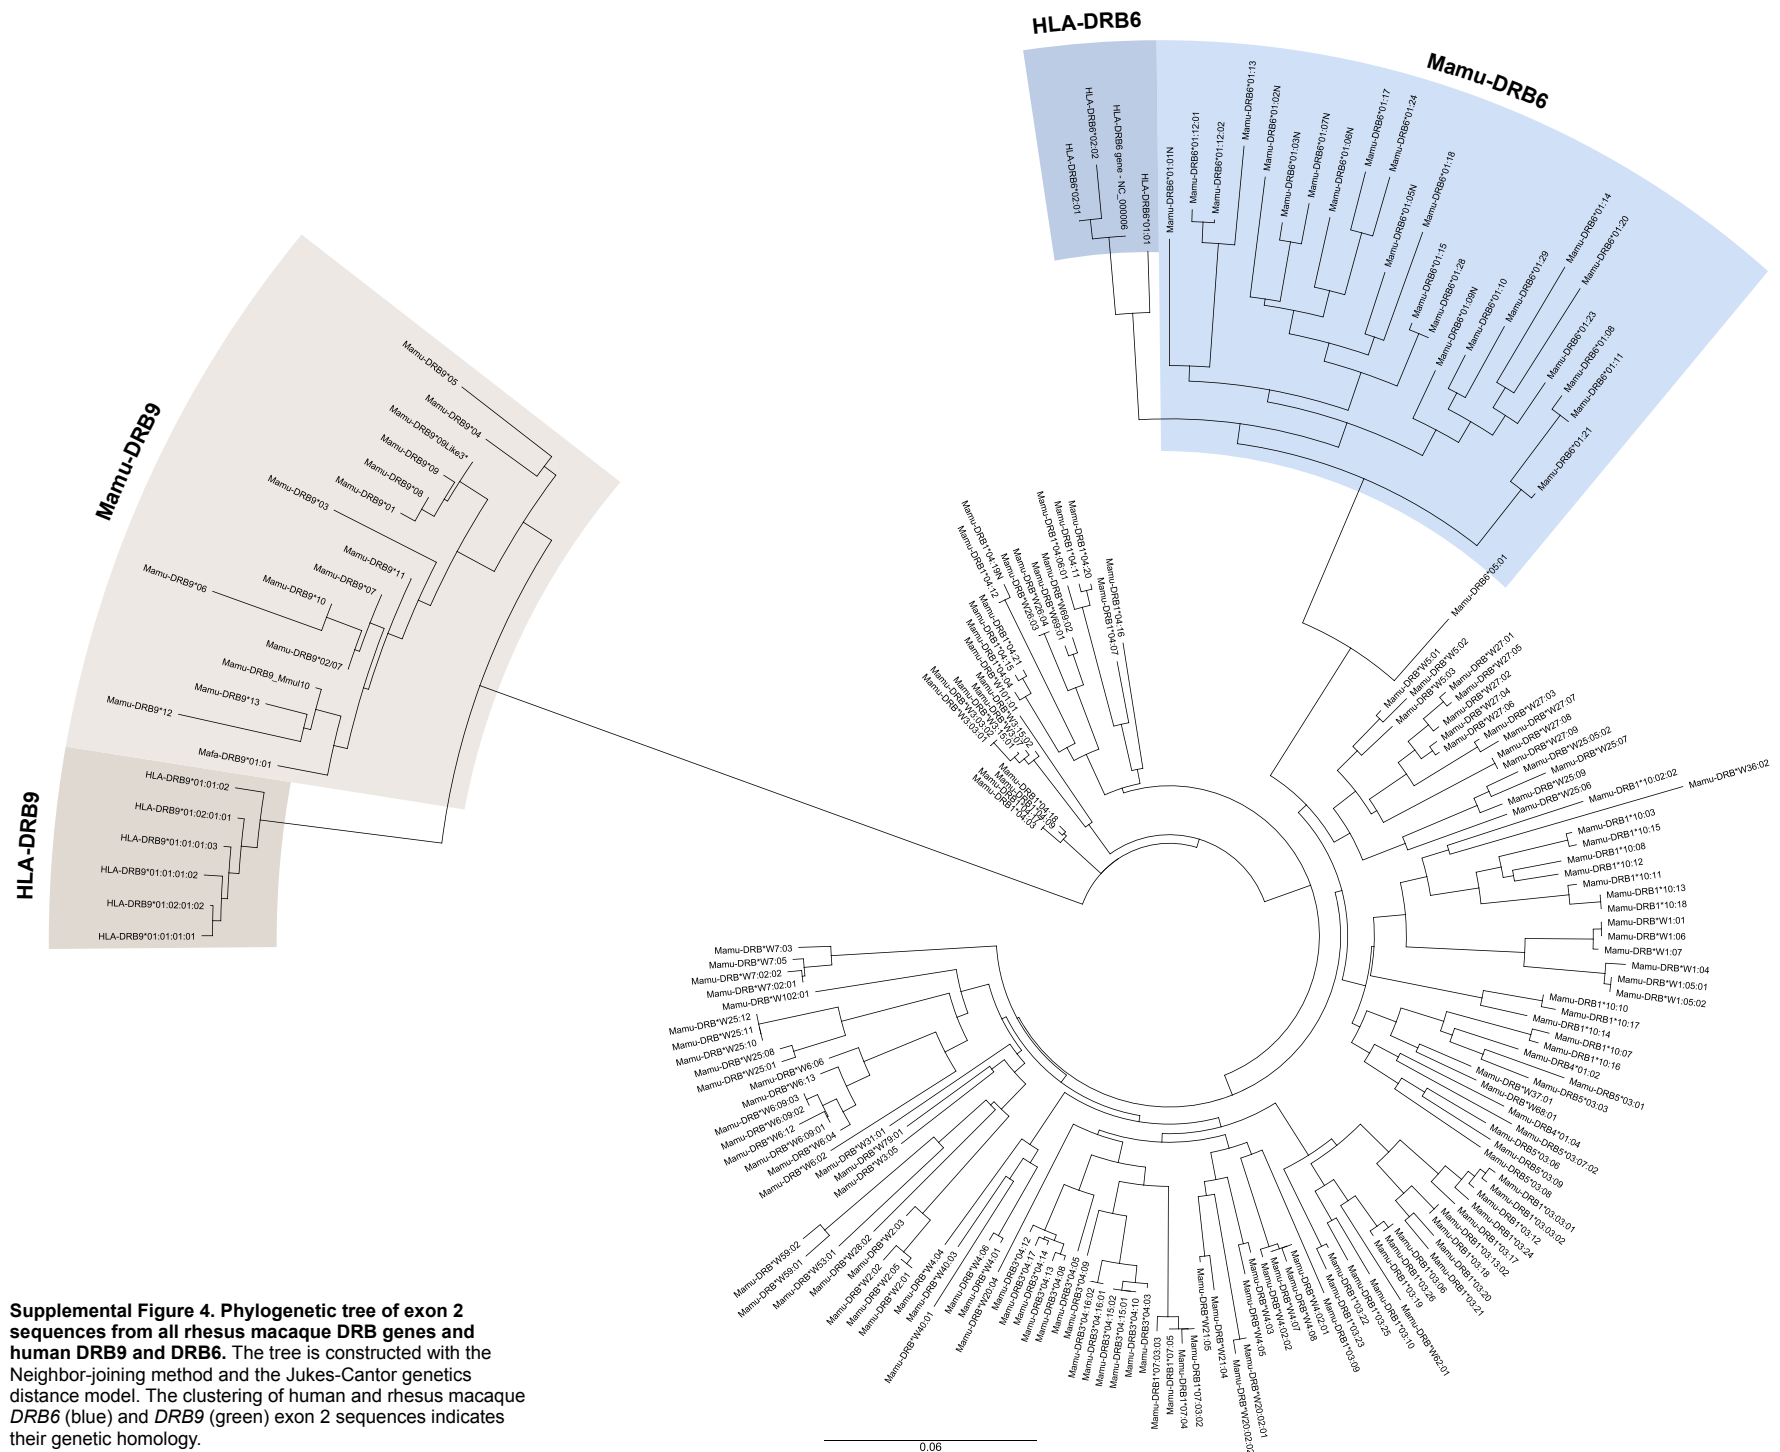

**Supplemental Figure 4. Phylogenetic tree of exon 2 sequences from all rhesus macaque DRB genes and human DRB9 and DRB6.** The tree is constructed with the Neighbor-joining method and the Jukes-Cantor genetics distance model. The clustering of human and rhesus macaque *DRB6* (blue) and *DRB9* (green) exon 2 sequences indicates their genetic homology.
