# Supplementary material for: Unraveling the architecture of major histocompatibility complex class II haplotypes in rhesus macaques
Source: HighWire-hosted journal article supplement (doi:10.1101/gr.278968.124), 2024-10-23
Supplement: Supplemental_Material.zip [file Supplemental_Table_S1.pdf › Supplemental_Table_S1.pdf]

**Supplemental Table 1. Overview of all MHC class II haplotypes identified in the rhesus macaque panel studied.** The haplotypes are numbered according to their *DR* region configurations, which were previously designated [25]. The two haplotypes that are marked with an asterisk (\*) were previously designated as 12 and 13a by Doxiadis *et al.* (2013), but they are found to share an identical region configuration according to our new assemblies. Two haplotypes reflect novel region configurations and are designated as "New". Two haplotypes were resolved from animals that have a mixed origin (e.g. Indian-Chinese, Indian-Burmese). The *DR* region, comprising the *DRA* locus and the diverse *DRB* gene combinations, is shaded in yellow. Known pseudogenes in the *DR* region are indicated by a grey text color. The *DQ* and *DP* genes are indicated with a blue and an orange background, respectively. Novel alleles are indicated with a "new" designation. Some parts of the *MHC* class II haplotypes could not be resolved due to low coverage, and are marked as Not determined (N.d.). Four genes were determined at low coverage (< 3X) and are marked by the blue text color. A *DP* tandem duplication was found in animal r16005, whereas all other *MHC* class II haplotypes only vary in gene content in their *DRB* region.

| #     | Animal                 | <i>DRA</i>  | <i>DRB9</i> | <i>DRB</i>       | <i>DRB</i>     | <i>DRB</i>     | <i>DRB</i>  | <i>DRB</i>  | <i>DRB</i> | <i>DRB</i>  | <i>DQA</i> | <i>DQB</i> | <i>DOB</i> | <i>TAP2</i> | <i>PSMB8</i> | <i>TAP1</i> | <i>PSMB9</i> | <i>DMB</i>  | <i>DMA</i>   | <i>BRD2</i> | <i>DQA</i> | <i>DPA</i> | <i>DPB</i> | <i>DPA</i> | <i>DPB</i> | <i>DPB2</i> |
|-------|------------------------|-------------|-------------|------------------|----------------|----------------|-------------|-------------|------------|-------------|------------|------------|------------|-------------|--------------|-------------|--------------|-------------|--------------|-------------|------------|------------|------------|------------|------------|-------------|
| 1a    | r14109, EAW            | 01:02:03:01 | 05          | DRB1*04:06:01:02 | DRB5*03:01:01  |                |             |             |            |             | 26:02:01   | 27:02      | new1:01    | new14       | new6         | new1:01     | new1         | 03:01new2   | 02:02:01new1 | new1:01     | 02new1     | 02:02:01   | 07:01      |            |            | 01new7      |
| 2     | r08033                 | 01:04:02:01 | 03new       | DRB3*04:03       | DRB*W003:05:01 |                |             |             |            |             | 24:01:01   | 18:10      | new4:02    | N.d.        | N.d.         | new6:03     | new5         | 03:02new4   | 02:01:04new  | new1:03:04  | 06new      | 02:05:01   | 15:01      |            |            | 01new2      |
| 3a    | r06048                 | 01:05:01:01 | 13          | DRB1*03:03       | DRB6*01:03N    | DRB1*10:07     |             |             |            |             | 26:01      | 18:01      | new1:01    | new3        | new5         | new6:01     | new5:02      | 03:01new2   | 02:02:01new2 | new1:01     | 02new1     | 02:02:01   | 07:01      |            |            | 01:03       |
| 3b    | r16093                 | 01:05:01:01 | 13          | DRB1*03:12       | DRB6*01:03N    | DRB1*10:07     |             |             |            |             | 26:01      | 18:01      | new4:04    | new1        | new7         | new1:01     | new1         | 03:01new1   | 02:02:01new2 | new1:01     | 02new1     | 02:02:01   | 07:01      |            |            | 01new11     |
| 3d    | 9066                   | 01:02:01new | 06          | DRB1*03:18       | DRB6*01:07N    | DRB1*10:03     |             |             |            |             | 01:02      | 06:05      | new1:03    | new11       | new12        | new6:03     | new5         | 03:02new4   | 02:01:04new  | new1:03:03  | 06new2     | 02:05:01   | 15:01      |            |            | 01new12     |
| 3e    | r07112, r06048, r09145 | 01:04:01new | 01          | DRB1*03:06       | DRB6*01:03N    | DRB1*10:07     |             |             |            |             | 26:01      | 18:01      | new1:01    | new3        | new5         | new6:01     | new5:02      | 03:02new2   | 02:02:02new  | new1:02:01  | 08new      | 02:08      | 06:04      |            |            | 01new5      |
| 4     | r16005                 | 01:02:04:01 | 01          | DRB1*03:09       | DRB6*01:01N    | DRB*W002:01    |             |             |            |             | 01:04:01   | 06:01      | new5       | new5        | new8         | new3        | new3         | 03:02new4   | 02:01:04new  | new1:03:01  | 05new1     | 11:01      | 18:01      | 07new      | 08new      | 01new9      |
| 4     | r04022                 | 01:02:04:01 | 01          | DRB1*03:09       | DRB6*01:01N    | DRB*W003:01    |             |             |            |             | 01:04:01   | 06:01      | new5       | new12       | new10        | new3        | new3         | 03:02new    | 02:01:04new3 | new1:02:02  | 03new      | 02:04      | 08:01      |            |            | 01new1:02   |
| 4     | r02034, EAW            | 01:02:04:01 | 01          | DRB1*03:09       | DRB6*01:01N    | DRB*W002:01    |             |             |            |             | 01:04:01   | 06:01      | new5       | new12       | new10        | new7        | new2         | 03:02new    | new2         | new1:03:02  | 05new2     | 02:05:01   | 15:01      |            |            | 01new12     |
| 5     | RIN14                  | 01:02:02new | 07          | DRB1*04:03       | DRB6*01:07N    | DRB*W005:01    |             |             |            |             | 24:02      | 28:01:01   | new4:05    | new9        | new2         | new5        | new5         | 03:01new1   | 02:02new     | new3        | 01new      | 02:03      | 08:02      |            |            | 01new5      |
| 5     | r04022, 8765           | 01:02:02new | 07          | DRB1*04:03       | DRB6*01:07N    | DRB*W005:01    |             |             |            |             | 24:02      | 28:01:01   | new6       | new13       | new2         | new8        | new5         | 03:02new2   | 02:01:04new4 | new5        | 10new      | 06:01:01   | 01:01      |            |            | 01new6:02   |
| 6     | 9066                   | 01:02:01:03 | 11          | DRB*W003:03      | DRB6*01:14     | DRB*W004:01    |             |             |            |             | 23:01      | 18:02      | new1:02    | new10       | new1         | new2:02     | new4         | 03:02new7   | 02:02new     | new2:01     | 04new      | 04:03:01   | 02:01      |            |            | 01new3      |
| 8     | r11021                 | 01:03:01:01 | 12          | DRB6*01:28       | DRB*W028:01    | DRB5*03:07:02  |             |             |            |             | 24:04      | 15:03      | new2:01    | new4        | new7         | new4        | new8         | 03:02:01ext | 02:01:01ext  | new1:01     | 02new2     | 04:01      | 03:02      |            |            | 01new4      |
| 11    | r11021                 | 01:03:01new | 09new       | DRB*W020:02:01   | DRB6*01:12:02N | DRB*W025:01    |             |             |            |             | 26:02:02   | 27:02      | new4:04    | new4        | new7         | new3        | new3         | 03:02new    | 02:01:04new  | new1:02:01  | 03new      | 02:04      | 08:01      |            |            | 01new1      |
| New18 | r02034                 | 01:04:01new | 08          | DRB*W020:02:01   | DRB6*01:02N    | DRB*W007:02:01 |             |             |            |             | 26:02:02   | 27:02      | new4:04    | new4        | new7         | new3        | new3         | 03:02new    | 02:01:04new5 | new1:03:03  | 06new      | 02:08      | 06:04      |            |            | 01new5      |
| 10    | r12023                 | 01:02:07:01 | 10          | DRB3*04:05       | DRB6*01:23     | DRB1*07:01     | DRB5*03:03  |             |            |             | 26:03      | 15:01:01   | new1:01:02 | new7        | new1         | new2        | new9         | 03:02:01ext | 02:01:01ext  | new1:01     | 02new1     | 02:07:01   | 05:01      |            |            | 01new10     |
| 9     | r16093                 | 01:02:05:01 | 09          | DRB1*04:04:01    | DRB6*01:20     | DRB*W003:07    | DRB6*01:02N | DRB*W007:02 |            |             | 26:02:02   | 27:02      | new1:01    | new4        | new6         | new3        | new3         | 03:02new2   | 02:02new2    | new1:03:02  | 05new2     | 02:05:01   | 15:01      |            |            | 01new12     |
| 12*   | RIN14                  | 01:02:01new | 06          | DRB1*03:18       | DRB6*01:05N    | DRB*W006:04    | DRB6*01:18  | DRB*W006:03 |            |             | 24:05      | 15:02      | new4:03    | new8        | new1         | new2:02     | new4         | 03:02new7   | 02:01:04new2 | new2:01     | 04new      | 04:03:01   | 02:01      |            |            | 01new13     |
| 12*   | r12023                 | 01:02:01new | 06          | DRB1*03:18       | DRB6*01:05N    | DRB*W006:04    | DRB6*01:18  | DRB*W006:03 |            |             | 24:05      | 15:02      | new4:03    | new8        | new1         | new2:02     | new4         | 03:02new    | 02:01:04new  | new1:01     | 05new2     | 02:05:01   | 15:01      |            |            | 01new2      |
| 14    | r09145, r14109         | 01:04new    | 03          | DRB3*04:10       | DRB6*01:07N    | DRB*W004:02:01 | DRB6*01:16N | DRB*W027:01 |            |             | 01:09      | 06:09      | new3       | new6        | new3         | new11       | new7         | 03new5      | new1         | new4        | 09new      | 07:10      | 19:06      |            |            | 01new8      |
| 15    | r08033                 | 01:03:01:01 | 04          | DRB*W021:04      | DRB6*01:11N    | DRB*W006:06    | DRB6*01:22  | DRB*W026:03 |            |             | 01:05:01   | 06:02:01   | new4:01    | new2        | new4         | new6:02     | new5         | 03:02new2   | 02:02:02new  | new1:02:01  | 08new      | 02:08      | 06:04      |            |            | 01new5      |
| 16    | 96009, r07112          | 01:02:06:01 | 02          | DRB1*03:10       | DRB6*01:06N    | DRB*W001:01    | DRB6*01:17  | DRB*W006:09 | DRB6*01:18 | DRB*W006:02 | 23:02      | 18:04      | new1:01    | new1        | new9         | new1:02     | new6         | 03:02new    | 02:01:04new  | new1:02:01  | 07new      | 06:01:01   | 01:01      |            |            | 01new6      |
| New17 | 96009 (Burmese)        | 01:02new    | 02          | DRB4*01:02       | DRB5*03:06     |                |             |             |            |             | 01:07      | 06:10      | new1:01    | new12       | new11        | new9        | N.d.         | 03:02new2   | 02:02new     | N.d.        | 04new      | 02:08      | 06:04      |            |            | 01new5      |
| 2     | 8765 (Chinese)         | 01:02:03new | 03          | DRB3*04:11       | DRB*W003:05:01 |                |             |             |            |             | 26:10      | 15:01:02   | New7       | New15       | New13        | New12       | new10        | 03new6      | new3         | new6        | 11new      | 04:02      | 02:02      |            |            | 01new14     |
