# Supplementary material for: Unraveling the architecture of major histocompatibility complex class II haplotypes in rhesus macaques
Source: HighWire-hosted journal article supplement (doi:10.1101/gr.278968.124), 2024-10-23
Supplement: Supplemental_Material.zip [file Supplemental_Table_S2.pdf › Supplemental_Table_S2.pdf]

**Supplemental Table S2. Raw and analyzed data of the rhesus macaque *MHC class II* haplotypes.** The ENA accession numbers are listed for the raw ONT read files and the assembled and annotated haplotype files per animal. The *MHC-DRB* haplotype numbers correspond to the haplotypes illustrated in Figure 5 and Supplemental Table S1.

| Animal | Raw ONT read files<br>accession number | <i>MHC-DRB</i><br>haplotype # | Haplotype<br>accession number |
|--------|----------------------------------------|-------------------------------|-------------------------------|
| 8765   | ERR12785015                            | 9                             | OZ023134                      |
|        |                                        | 9                             | OZ023132                      |
| 9066   | ERR12779146                            | 3D                            | OZ023133                      |
|        |                                        | 6                             | OZ023839                      |
| R02034 | ERR12778894                            | 4                             | OZ023130                      |
|        |                                        | 18                            | OZ023727                      |
| 96009  | ERR12778853                            | 9                             | OZ023106                      |
|        |                                        | 16                            | OZ023126                      |
| R04022 | ERR12778673                            | 4                             | OZ023131                      |
|        |                                        | 9                             | OZ023134                      |
| EAW    | ERR12778399                            | 1A                            | OZ023127                      |
|        |                                        | 4                             | OZ023130                      |
| R06048 | ERR12778375                            | 3A                            | OZ023136                      |
|        |                                        | 3E                            | OZ023137                      |
| R07112 | ERR12778351                            | 3E                            | OZ023137                      |
|        |                                        | 16                            | OZ023126                      |
| R08033 | ERR12778349                            | 2                             | OZ023128                      |
|        |                                        | 15                            | OZ023936                      |
| R09145 | ERR12778348                            | 3E                            | OZ023137                      |
|        |                                        | 14                            | OZ023107                      |
| R12023 | ERR12778257                            | 10                            | OZ023728                      |
|        |                                        | 12                            | OZ023104                      |
| R11021 | ERR12778255                            | 8                             | OZ023935                      |
|        |                                        | 11                            | OZ023840                      |
| R16005 | ERR12778253                            | 4                             | OZ023129                      |
|        |                                        | 4                             | OZ023129                      |
| R16093 | ERR12778242                            | 3B                            | OZ023135                      |
|        |                                        | 9                             | OZ023102                      |
| R14109 | ERR12778241                            | 1A                            | OZ023127                      |
|        |                                        | 14                            | OZ023107                      |
| RiN14  | ERR12771506                            | 9                             | OZ023103                      |
|        |                                        | 12                            | OZ023105                      |
